# Supplementary material for: Effect of Cyclodextrins on the Biofilm Formation Capacity of Pseudomonas aeruginosa PAO1
Source: MDPI journal article supplement (doi:10.3390/molecules27113603), 2022-06-03
Supplement: s1 [file s1]

## S1. SUPPLEMENTARY MATERIALS

### Effect of Cyclodextrins on the Biofilm Formation Capacity of *Pseudomonas aeruginosa* PAO1

Zsófia Berkl<sup>1</sup>, Ildikó Fekete-Kertész<sup>1</sup>, Kata Buda<sup>1</sup>, Emese Vaszita<sup>1</sup>, Éva Fenyvesi<sup>2</sup>, Lajos Szenté<sup>2</sup> and Mónika Molnár<sup>1,\*</sup>

<sup>1</sup> Department of Applied Biotechnology and Food Science, Budapest University of Technology and Economics, Budapest, Hungary; berkl.zsofia@vbk.bme.hu (Z.B.); feketekertesz.ildiko@vbk.bme.hu (I.F.K.); kata.buda.bk@gmail.com (K.B.); vaszita.emese@vbk.bme.hu (E.V.); molnar.monika@vbk.bme.hu (M.M.)

<sup>2</sup> CycloLab Cyclodextrin R & D Laboratory Ltd., Budapest, Hungary; fenyvesi.e@cyclolab.hu (É.F.); szente@cyclolab.hu (L.S.)

\* Correspondence: molnar.monika@vbk.bme.hu

## RESULTS OF OPTICAL DENSITY MEASUREMENT

# S1. SUPPLEMENTARY MATERIALS - RESULTS OF OPTICAL DENSITY MEASUREMENT

**Table S1.** Effect of the native  $\alpha$ -cyclodextrin on the population growth of *P. aeruginosa*, determined through the measurement of the optical density

| T    | Tested sample |         | Optical density [-] |             |             |             |
|------|---------------|---------|---------------------|-------------|-------------|-------------|
|      |               |         | 6 h                 | 24 h        | 48 h        | 72 h        |
| 22°C | ACD [mM]      | Control | 0.01 ± 0.00         | 0.22 ± 0.01 | 0.53 ± 0.01 | 0.65 ± 0.04 |
|      |               | 0.1     | 0.01 ± 0.00         | 0.26 ± 0.00 | 0.65 ± 0.02 | 0.71 ± 0.01 |
|      |               | 0.5     | 0.01 ± 0.00         | 0.28 ± 0.00 | 0.64 ± 0.02 | 0.95 ± 0.01 |
|      |               | 2.5     | 0.01 ± 0.00         | 0.26 ± 0.01 | 0.75 ± 0.01 | 0.91 ± 0.02 |
|      |               | 12.5    | 0.01 ± 0.00         | 0.24 ± 0.01 | 0.68 ± 0.01 | 0.58 ± 0.02 |
| 30°C | ACD [mM]      | Control | 0.03 ± 0.00         | 0.68 ± 0.02 | 0.61 ± 0.02 | 0.62 ± 0.02 |
|      |               | 0.1     | 0.04 ± 0.00         | 0.69 ± 0.01 | 0.69 ± 0.03 | 0.74 ± 0.02 |
|      |               | 0.5     | 0.04 ± 0.00         | 0.78 ± 0.03 | 0.75 ± 0.05 | 0.79 ± 0.03 |
|      |               | 2.5     | 0.04 ± 0.01         | 0.93 ± 0.02 | 0.95 ± 0.03 | 0.87 ± 0.02 |
|      |               | 12.5    | 0.04 ± 0.00         | 0.73 ± 0.04 | 0.79 ± 0.04 | 0.62 ± 0.01 |

**Table S2.** Effect of the native  $\alpha$ -cyclodextrin on the optical density of the planktonic supernatant of *P. aeruginosa*

| T    | Tested sample |         | Optical density of the planktonic supernatant [-] |             |             |             |
|------|---------------|---------|---------------------------------------------------|-------------|-------------|-------------|
|      |               |         | 6 h                                               | 24 h        | 48 h        | 72 h        |
| 22°C | ACD [mM]      | Control | 0.01 ± 0.00                                       | 0.07 ± 0.00 | 0.36 ± 0.01 | 0.60 ± 0.02 |
|      |               | 0.1     | 0.00 ± 0.00                                       | 0.08 ± 0.00 | 0.31 ± 0.02 | 0.56 ± 0.02 |
|      |               | 0.5     | 0.00 ± 0.00                                       | 0.09 ± 0.00 | 0.25 ± 0.00 | 0.72 ± 0.01 |
|      |               | 2.5     | 0.01 ± 0.00                                       | 0.10 ± 0.00 | 0.34 ± 0.01 | 0.69 ± 0.03 |
|      |               | 12.5    | 0.01 ± 0.00                                       | 0.10 ± 0.00 | 0.39 ± 0.01 | 0.59 ± 0.01 |
| 30°C | ACD [mM]      | Control | 0.02 ± 0.00                                       | 0.39 ± 0.02 | 0.47 ± 0.03 | 0.44 ± 0.02 |
|      |               | 0.1     | 0.03 ± 0.00                                       | 0.44 ± 0.02 | 0.59 ± 0.02 | 0.52 ± 0.02 |
|      |               | 0.5     | 0.03 ± 0.00                                       | 0.50 ± 0.02 | 0.61 ± 0.03 | 0.56 ± 0.03 |
|      |               | 2.5     | 0.03 ± 0.00                                       | 0.61 ± 0.02 | 0.94 ± 0.01 | 0.78 ± 0.07 |
|      |               | 12.5    | 0.03 ± 0.00                                       | 0.51 ± 0.01 | 0.78 ± 0.03 | 0.55 ± 0.04 |

**Table S3.** Effect of the randomly methylated  $\alpha$ -cyclodextrin on the population growth of *P. aeruginosa*, determined through the measurement of the optical density

| T    | Tested sample |         | Optical density [-] |             |             |             |
|------|---------------|---------|---------------------|-------------|-------------|-------------|
|      |               |         | 6 h                 | 24 h        | 48 h        | 72 h        |
| 22°C | RAMEA [mM]    | Control | 0.01 ± 0.00         | 0.22 ± 0.01 | 0.53 ± 0.01 | 0.65 ± 0.04 |
|      |               | 0.1     | 0.01 ± 0.00         | 0.25 ± 0.01 | 0.65 ± 0.01 | 0.74 ± 0.01 |
|      |               | 0.5     | 0.01 ± 0.00         | 0.20 ± 0.00 | 0.64 ± 0.01 | 0.90 ± 0.01 |
|      |               | 2.5     | 0.01 ± 0.00         | 0.26 ± 0.01 | 0.68 ± 0.02 | 0.92 ± 0.01 |
|      |               | 12.5    | 0.01 ± 0.00         | 0.24 ± 0.00 | 0.63 ± 0.01 | 0.79 ± 0.01 |
| 30°C | RAMEA [mM]    | Control | 0.03 ± 0.00         | 0.68 ± 0.02 | 0.61 ± 0.02 | 0.62 ± 0.02 |
|      |               | 0.1     | 0.04 ± 0.01         | 0.63 ± 0.03 | 0.73 ± 0.02 | 0.76 ± 0.03 |
|      |               | 0.5     | 0.04 ± 0.01         | 0.83 ± 0.01 | 0.86 ± 0.04 | 0.64 ± 0.02 |
|      |               | 2.5     | 0.04 ± 0.00         | 0.81 ± 0.07 | 0.90 ± 0.04 | 0.85 ± 0.08 |
|      |               | 12.5    | 0.05 ± 0.00         | 0.60 ± 0.02 | 0.78 ± 0.02 | 0.72 ± 0.03 |

**Table S4.** Effect of the randomly methylated  $\alpha$ -cyclodextrin on the optical density of the planktonic supernatant of *P. aeruginosa*

| T    | Tested sample |         | Optical density of the planktonic supernatant [-] |             |             |             |
|------|---------------|---------|---------------------------------------------------|-------------|-------------|-------------|
|      |               |         | 6 h                                               | 24 h        | 48 h        | 72 h        |
| 22°C | RAMEA [mM]    | Control | 0.01 ± 0.00                                       | 0.07 ± 0.00 | 0.36 ± 0.01 | 0.60 ± 0.02 |
|      |               | 0.1     | 0.01 ± 0.00                                       | 0.07 ± 0.00 | 0.30 ± 0.02 | 0.63 ± 0.01 |
|      |               | 0.5     | 0.01 ± 0.00                                       | 0.07 ± 0.00 | 0.24 ± 0.01 | 0.66 ± 0.02 |
|      |               | 2.5     | 0.01 ± 0.00                                       | 0.09 ± 0.01 | 0.35 ± 0.01 | 0.73 ± 0.01 |
|      |               | 12.5    | 0.01 ± 0.00                                       | 0.10 ± 0.00 | 0.38 ± 0.01 | 0.68 ± 0.02 |
| 30°C | RAMEA [mM]    | Control | 0.02 ± 0.00                                       | 0.39 ± 0.02 | 0.47 ± 0.03 | 0.44 ± 0.02 |
|      |               | 0.1     | 0.03 ± 0.00                                       | 0.42 ± 0.00 | 0.58 ± 0.02 | 0.53 ± 0.50 |
|      |               | 0.5     | 0.03 ± 0.00                                       | 0.51 ± 0.03 | 0.84 ± 0.05 | 0.50 ± 0.02 |
|      |               | 2.5     | 0.03 ± 0.00                                       | 0.51 ± 0.02 | 0.91 ± 0.03 | 0.83 ± 0.03 |
|      |               | 12.5    | 0.03 ± 0.00                                       | 0.40 ± 0.03 | 0.73 ± 0.02 | 0.73 ± 0.06 |

**Table S5.** Effect of the trimethyl-aminopropyl  $\alpha$ -cyclodextrin on the population growth of *P. aeruginosa*, determined through the measurement of the optical density

| T    | Tested sample |         | Optical density [-] |             |             |             |
|------|---------------|---------|---------------------|-------------|-------------|-------------|
|      |               |         | 6 h                 | 24 h        | 48 h        | 72 h        |
| 22°C | QAACD [mM]    | Control | 0.08 ± 0.00         | 0.47 ± 0.02 | 0.85 ± 0.02 | 0.85 ± 0.02 |
|      |               | 0.1     | 0.08 ± 0.00         | 0.48 ± 0.02 | 0.87 ± 0.02 | 0.88 ± 0.02 |
|      |               | 0.5     | 0.08 ± 0.00         | 0.47 ± 0.02 | 0.93 ± 0.02 | 0.98 ± 0.02 |
|      |               | 2.5     | 0.07 ± 0.00         | 0.46 ± 0.01 | 1.06 ± 0.04 | 1.15 ± 0.03 |
|      |               | 12.5    | 0.07 ± 0.00         | 0.52 ± 0.02 | 1.15 ± 0.04 | 1.24 ± 0.04 |
| 30°C | QAACD [mM]    | Control | 0.31 ± 0.01         | 0.71 ± 0.02 | 0.62 ± 0.05 | 0.67 ± 0.03 |
|      |               | 0.1     | 0.31 ± 0.01         | 0.72 ± 0.01 | 0.65 ± 0.02 | 0.66 ± 0.02 |
|      |               | 0.5     | 0.31 ± 0.00         | 0.83 ± 0.02 | 0.72 ± 0.02 | 0.65 ± 0.01 |
|      |               | 2.5     | 0.31 ± 0.00         | 1.05 ± 0.02 | 0.99 ± 0.04 | 0.75 ± 0.02 |
|      |               | 12.5    | 0.32 ± 0.05         | 0.98 ± 0.01 | 1.17 ± 0.03 | 1.07 ± 0.04 |

**Table S6.** Effect of the trimethyl-aminopropyl  $\alpha$ -cyclodextrin on the optical density of the planktonic supernatant of *P. aeruginosa*

| T    | Tested sample |         | Optical density of the planktonic supernatant [-] |             |             |             |
|------|---------------|---------|---------------------------------------------------|-------------|-------------|-------------|
|      |               |         | 6 h                                               | 24 h        | 48 h        | 72 h        |
| 22°C | QAACD [mM]    | Control | 0.05 ± 0.00                                       | 0.15 ± 0.01 | 0.41 ± 0.02 | 0.45 ± 0.04 |
|      |               | 0.1     | 0.05 ± 0.00                                       | 0.18 ± 0.02 | 0.43 ± 0.02 | 0.47 ± 0.03 |
|      |               | 0.5     | 0.05 ± 0.00                                       | 0.15 ± 0.02 | 0.48 ± 0.02 | 0.49 ± 0.03 |
|      |               | 2.5     | 0.05 ± 0.00                                       | 0.14 ± 0.02 | 0.54 ± 0.05 | 0.68 ± 0.03 |
|      |               | 12.5    | 0.05 ± 0.00                                       | 0.26 ± 0.02 | 0.84 ± 0.03 | 0.55 ± 0.04 |
| 30°C | QAACD [mM]    | Control | 0.14 ± 0.01                                       | 0.53 ± 0.03 | 0.40 ± 0.05 | 0.39 ± 0.04 |
|      |               | 0.1     | 0.14 ± 0.01                                       | 0.53 ± 0.03 | 0.36 ± 0.04 | 0.42 ± 0.03 |
|      |               | 0.5     | 0.13 ± 0.01                                       | 0.57 ± 0.05 | 0.39 ± 0.05 | 0.35 ± 0.02 |
|      |               | 2.5     | 0.16 ± 0.01                                       | 0.70 ± 0.03 | 0.82 ± 0.04 | 0.51 ± 0.09 |
|      |               | 12.5    | 0.17 ± 0.0                                        | 0.74 ± 0.04 | 0.93 ± 0.04 | 0.92 ± 0.06 |

**Table S7.** Effect of the  $\alpha$ -cyclodextrin polymer on the optical density of the planktonic supernatant of *P. aeruginosa*

| T    | Tested sample |         | Optical density [-] |             |             |             |
|------|---------------|---------|---------------------|-------------|-------------|-------------|
|      |               |         | 6 h                 | 24 h        | 48 h        | 72 h        |
| 22°C | ACDPS [mM]    | Control | 0.08 ± 0.00         | 0.47 ± 0.02 | 0.85 ± 0.02 | 0.85 ± 0.02 |
|      |               | 0.1     | 0.08 ± 0.01         | 0.43 ± 0.01 | 0.82 ± 0.03 | 0.84 ± 0.03 |
|      |               | 0.5     | 0.07 ± 0.01         | 0.44 ± 0.02 | 0.84 ± 0.03 | 0.93 ± 0.02 |
|      |               | 2.5     | 0.07 ± 0.00         | 0.42 ± 0.02 | 0.76 ± 0.03 | 0.88 ± 0.02 |
|      |               | 12.5    | 0.09 ± 0.01         | 0.49 ± 0.02 | 0.77 ± 0.02 | 0.88 ± 0.03 |
| 30°C | ACDPS [mM]    | Control | 0.31 ± 0.01         | 0.71 ± 0.02 | 0.62 ± 0.05 | 0.67 ± 0.03 |
|      |               | 0.1     | 0.31 ± 0.01         | 0.73 ± 0.02 | 0.67 ± 0.01 | 0.62 ± 0.02 |
|      |               | 0.5     | 0.30 ± 0.01         | 0.77 ± 0.03 | 0.94 ± 0.02 | 0.68 ± 0.01 |
|      |               | 2.5     | 0.29 ± 0.00         | 0.75 ± 0.03 | 0.98 ± 0.03 | 0.75 ± 0.04 |
|      |               | 12.5    | 0.35 ± 0.02         | 0.74 ± 0.03 | 0.93 ± 0.03 | 0.71 ± 0.04 |

**Table S8.** Effect of the  $\alpha$ -cyclodextrin polymer on the population growth of *P. aeruginosa*, determined through the measurement of the optical density

| T    | Tested sample |         | Optical density of the planktonic supernatant [-] |             |             |             |
|------|---------------|---------|---------------------------------------------------|-------------|-------------|-------------|
|      |               |         | 6 h                                               | 24 h        | 48 h        | 72 h        |
| 22°C | ACDPS [mM]    | Control | 0.05 ± 0.00                                       | 0.15 ± 0.01 | 0.41 ± 0.02 | 0.45 ± 0.04 |
|      |               | 0.1     | 0.05 ± 0.00                                       | 0.11 ± 0.01 | 0.45 ± 0.01 | 0.51 ± 0.03 |
|      |               | 0.5     | 0.05 ± 0.00                                       | 0.11 ± 0.01 | 0.45 ± 0.02 | 0.53 ± 0.01 |
|      |               | 2.5     | 0.05 ± 0.00                                       | 0.12 ± 0.00 | 0.45 ± 0.03 | 0.49 ± 0.07 |
|      |               | 12.5    | 0.06 ± 0.01                                       | 0.22 ± 0.02 | 0.47 ± 0.02 | 0.54 ± 0.03 |
| 30°C | ACDPS [mM]    | Control | 0.14 ± 0.01                                       | 0.53 ± 0.03 | 0.40 ± 0.05 | 0.39 ± 0.04 |
|      |               | 0.1     | 0.14 ± 0.01                                       | 0.51 ± 0.02 | 0.29 ± 0.01 | 0.36 ± 0.05 |
|      |               | 0.5     | 0.15 ± 0.00                                       | 0.44 ± 0.04 | 0.66 ± 0.03 | 0.56 ± 0.05 |
|      |               | 2.5     | 0.14 ± 0.01                                       | 0.44 ± 0.04 | 0.66 ± 0.03 | 0.51 ± 0.04 |
|      |               | 12.5    | 0.16 ± 0.01                                       | 0.27 ± 0.02 | 0.54 ± 0.03 | 0.55 ± 0.04 |

**Table S9.** Effect of the native  $\beta$ -cyclodextrin on the population growth of *P. aeruginosa*, determined through the measurement of the optical density

| T    | Tested sample |         | Optical density [-] |             |             |             |
|------|---------------|---------|---------------------|-------------|-------------|-------------|
|      |               |         | 6 h                 | 24 h        | 48 h        | 72 h        |
| 22°C | BCD [mM]      | Control | 0.01 ± 0.00         | 0.24 ± 0.00 | 0.73 ± 0.01 | 0.85 ± 0.01 |
|      |               | 0.1     | 0.01 ± 0.00         | 0.24 ± 0.01 | 0.73 ± 0.01 | 0.89 ± 0.01 |
|      |               | 0.5     | 0.01 ± 0.00         | 0.25 ± 0.01 | 0.73 ± 0.01 | 0.70 ± 0.01 |
|      |               | 2.5     | 0.01 ± 0.00         | 0.25 ± 0.01 | 0.73 ± 0.01 | 0.94 ± 0.02 |
|      |               | 12.5    | 0.01 ± 0.00         | 0.24 ± 0.00 | 0.73 ± 0.01 | 0.88 ± 0.01 |
| 30°C | BCD [mM]      | Control | 0.06 ± 0.00         | 0.67 ± 0.02 | 0.70 ± 0.02 | 0.64 ± 0.03 |
|      |               | 0.1     | 0.06 ± 0.01         | 0.67 ± 0.01 | 0.72 ± 0.01 | 0.65 ± 0.02 |
|      |               | 0.5     | 0.06 ± 0.00         | 0.70 ± 0.03 | 0.73 ± 0.02 | 0.68 ± 0.05 |
|      |               | 2.5     | 0.06 ± 0.01         | 0.81 ± 0.03 | 0.94 ± 0.05 | 0.69 ± 0.03 |
|      |               | 12.5    | 0.08 ± 0.01         | 0.74 ± 0.01 | 0.85 ± 0.04 | 0.72 ± 0.03 |

**Table S10.** Effect of the native  $\beta$ -cyclodextrin on the optical density of the planktonic supernatant of *P. aeruginosa*

| T    | Tested sample | Optical density of the planktonic supernatant [-] |             |             |             |
|------|---------------|---------------------------------------------------|-------------|-------------|-------------|
|      |               | 6 h                                               | 24 h        | 48 h        | 72 h        |
| 22°C | Control       | 0.01 ± 0.00                                       | 0.09 ± 0.01 | 0.37 ± 0.03 | 0.61 ± 0.03 |
|      | BCD [mM]      | 0.1                                               | 0.01 ± 0.00 | 0.08 ± 0.01 | 0.35 ± 0.01 |
|      |               | 0.5                                               | 0.01 ± 0.00 | 0.10 ± 0.00 | 0.33 ± 0.01 |
|      |               | 2.5                                               | 0.01 ± 0.00 | 0.34 ± 0.02 | 0.65 ± 0.03 |
|      |               | 12.5                                              | 0.01 ± 0.00 | 0.08 ± 0.01 | 0.40 ± 0.03 |
| 30°C | Control       | 0.08 ± 0.00                                       | 0.44 ± 0.02 | 0.56 ± 0.03 | 0.54 ± 0.02 |
|      | BCD [mM]      | 0.1                                               | 0.08 ± 0.01 | 0.44 ± 0.01 | 0.55 ± 0.04 |
|      |               | 0.5                                               | 0.08 ± 0.01 | 0.47 ± 0.02 | 0.62 ± 0.01 |
|      |               | 2.5                                               | 0.08 ± 0.00 | 0.45 ± 0.03 | 0.91 ± 0.05 |
|      |               | 12.5                                              | 0.09 ± 0.00 | 0.44 ± 0.02 | 0.79 ± 0.03 |

**Table S11.** Effect of the randomly methylated  $\beta$ -cyclodextrin on the population growth of *P. aeruginosa*, determined through the measurement of the optical density

| T    | Tested sample | Optical density [-] |             |             |             |
|------|---------------|---------------------|-------------|-------------|-------------|
|      |               | 6 h                 | 24 h        | 48 h        | 72 h        |
| 22°C | Control       | 0.01 ± 0.00         | 0.24 ± 0.00 | 0.73 ± 0.01 | 0.85 ± 0.01 |
|      | RAMEB [mM]    | 0.1                 | 0.01 ± 0.00 | 0.24 ± 0.01 | 0.72 ± 0.01 |
|      |               | 0.5                 | 0.01 ± 0.00 | 0.25 ± 0.01 | 0.75 ± 0.01 |
|      |               | 2.5                 | 0.01 ± 0.00 | 0.24 ± 0.01 | 0.83 ± 0.01 |
|      |               | 12.5                | 0.01 ± 0.00 | 0.22 ± 0.02 | 0.89 ± 0.02 |
| 30°C | Control       | 0.06 ± 0.00         | 0.67 ± 0.02 | 0.70 ± 0.02 | 0.64 ± 0.03 |
|      | RAMEB [mM]    | 0.1                 | 0.05 ± 0.00 | 0.68 ± 0.03 | 0.74 ± 0.01 |
|      |               | 0.5                 | 0.06 ± 0.00 | 0.84 ± 0.01 | 0.72 ± 0.02 |
|      |               | 2.5                 | 0.06 ± 0.01 | 0.86 ± 0.02 | 1.03 ± 0.04 |
|      |               | 12.5                | 0.07 ± 0.00 | 1.06 ± 0.03 | 1.17 ± 0.03 |

**Table S12.** Effect of the randomly methylated  $\beta$ -cyclodextrin on the optical density of the planktonic supernatant of *P. aeruginosa*

| T    | Tested sample | Optical density of the planktonic supernatant [-] |             |             |             |
|------|---------------|---------------------------------------------------|-------------|-------------|-------------|
|      |               | 6 h                                               | 24 h        | 48 h        | 72 h        |
| 22°C | Control       | 0.01 ± 0.00                                       | 0.09 ± 0.01 | 0.37 ± 0.03 | 0.61 ± 0.03 |
|      | RAMEB [mM]    | 0.1                                               | 0.01 ± 0.00 | 0.08 ± 0.01 | 0.32 ± 0.01 |
|      |               | 0.5                                               | 0.01 ± 0.00 | 0.09 ± 0.01 | 0.35 ± 0.02 |
|      |               | 2.5                                               | 0.01 ± 0.00 | 0.10 ± 0.01 | 0.38 ± 0.02 |
|      |               | 12.5                                              | 0.01 ± 0.00 | 0.09 ± 0.00 | 0.47 ± 0.03 |
| 30°C | Control       | 0.08 ± 0.00                                       | 0.44 ± 0.02 | 0.56 ± 0.03 | 0.54 ± 0.02 |
|      | RAMEB [mM]    | 0.1                                               | 0.08 ± 0.00 | 0.46 ± 0.02 | 0.50 ± 0.02 |
|      |               | 0.5                                               | 0.08 ± 0.00 | 0.52 ± 0.01 | 0.54 ± 0.03 |
|      |               | 2.5                                               | 0.09 ± 0.01 | 0.54 ± 0.02 | 0.99 ± 0.06 |
|      |               | 12.5                                              | 0.09 ± 0.00 | 0.78 ± 0.04 | 1.13 ± 0.03 |

**Table S13.** Effect of the trimethyl-aminopropyl  $\beta$ -cyclodextrin on the population growth of *P. aeruginosa*, determined through the measurement of the optical density

| T    | Tested sample |         | Optical density [-] |                 |                 |                 |
|------|---------------|---------|---------------------|-----------------|-----------------|-----------------|
|      |               |         | 6 h                 | 24 h            | 48 h            | 72 h            |
| 22°C | QABCD [mM]    | Control | 0.02 $\pm$ 0.00     | 0.40 $\pm$ 0.01 | 0.80 $\pm$ 0.02 | 0.89 $\pm$ 0.03 |
|      |               | 0.1     | 0.02 $\pm$ 0.00     | 0.40 $\pm$ 0.01 | 0.81 $\pm$ 0.01 | 0.90 $\pm$ 0.03 |
|      |               | 0.5     | 0.01 $\pm$ 0.00     | 0.40 $\pm$ 0.02 | 0.81 $\pm$ 0.02 | 0.95 $\pm$ 0.01 |
|      |               | 2.5     | 0.01 $\pm$ 0.00     | 0.39 $\pm$ 0.01 | 0.85 $\pm$ 0.02 | 0.98 $\pm$ 0.01 |
|      |               | 12.5    | 0.01 $\pm$ 0.00     | 0.38 $\pm$ 0.00 | 0.82 $\pm$ 0.03 | 0.97 $\pm$ 0.03 |
| 30°C | QABCD [mM]    | Control | 0.11 $\pm$ 0.02     | 0.69 $\pm$ 0.01 | 0.59 $\pm$ 0.02 | 0.54 $\pm$ 0.03 |
|      |               | 0.1     | 0.13 $\pm$ 0.01     | 0.72 $\pm$ 0.01 | 0.56 $\pm$ 0.03 | 0.55 $\pm$ 0.01 |
|      |               | 0.5     | 0.14 $\pm$ 0.00     | 0.75 $\pm$ 0.01 | 0.62 $\pm$ 0.01 | 0.54 $\pm$ 0.01 |
|      |               | 2.5     | 0.13 $\pm$ 0.00     | 0.79 $\pm$ 0.02 | 0.92 $\pm$ 0.02 | 0.41 $\pm$ 0.01 |
|      |               | 12.5    | 0.13 $\pm$ 0.00     | 0.90 $\pm$ 0.05 | 0.92 $\pm$ 0.04 | 0.96 $\pm$ 0.04 |

**Table S14.** Effect of the trimethyl-aminopropyl  $\beta$ -cyclodextrin on the optical density of the planktonic supernatant of *P. aeruginosa*

| T    | Tested sample |         | Optical density of the planktonic supernatant [-] |                 |                 |                 |
|------|---------------|---------|---------------------------------------------------|-----------------|-----------------|-----------------|
|      |               |         | 6 h                                               | 24 h            | 48 h            | 72 h            |
| 22°C | QABCD [mM]    | Control | 0.01 $\pm$ 0.00                                   | 0.18 $\pm$ 0.02 | 0.42 $\pm$ 0.02 | 0.97 $\pm$ 0.06 |
|      |               | 0.1     | 0.02 $\pm$ 0.00                                   | 0.15 $\pm$ 0.01 | 0.42 $\pm$ 0.01 | 0.97 $\pm$ 0.09 |
|      |               | 0.5     | 0.02 $\pm$ 0.00                                   | 0.17 $\pm$ 0.01 | 0.42 $\pm$ 0.01 | 1.07 $\pm$ 0.05 |
|      |               | 2.5     | 0.01 $\pm$ 0.00                                   | 0.19 $\pm$ 0.01 | 0.48 $\pm$ 0.01 | 1.10 $\pm$ 0.09 |
|      |               | 12.5    | 0.01 $\pm$ 0.00                                   | 0.18 $\pm$ 0.02 | 0.42 $\pm$ 0.03 | 1.08 $\pm$ 0.13 |
| 30°C | QABCD [mM]    | Control | 0.07 $\pm$ 0.00                                   | 0.38 $\pm$ 0.02 | 0.40 $\pm$ 0.03 | 0.49 $\pm$ 0.03 |
|      |               | 0.1     | 0.06 $\pm$ 0.00                                   | 0.42 $\pm$ 0.02 | 0.44 $\pm$ 0.03 | 0.51 $\pm$ 0.07 |
|      |               | 0.5     | 0.07 $\pm$ 0.00                                   | 0.42 $\pm$ 0.01 | 0.50 $\pm$ 0.04 | 0.48 $\pm$ 0.04 |
|      |               | 2.5     | 0.07 $\pm$ 0.00                                   | 0.33 $\pm$ 0.01 | 0.74 $\pm$ 0.01 | 1.07 $\pm$ 0.11 |
|      |               | 12.5    | 0.07 $\pm$ 0.00                                   | 0.53 $\pm$ 0.02 | 0.52 $\pm$ 0.03 | 1.18 $\pm$ 0.17 |

**Table S15.** Effect of the  $\beta$ -cyclodextrin polymer on the population growth of *P. aeruginosa*, determined through the measurement of the optical density

| T    | Tested sample |         | Optical density [-] |                 |                 |                 |
|------|---------------|---------|---------------------|-----------------|-----------------|-----------------|
|      |               |         | 6 h                 | 24 h            | 48 h            | 72 h            |
| 22°C | BCDPS [mM]    | Control | 0.02 $\pm$ 0.00     | 0.43 $\pm$ 0.01 | 0.87 $\pm$ 0.03 | 0.91 $\pm$ 0.01 |
|      |               | 0.1     | 0.02 $\pm$ 0.00     | 0.43 $\pm$ 0.01 | 0.85 $\pm$ 0.01 | 0.92 $\pm$ 0.01 |
|      |               | 0.5     | 0.02 $\pm$ 0.00     | 0.40 $\pm$ 0.00 | 0.85 $\pm$ 0.02 | 0.92 $\pm$ 0.01 |
|      |               | 2.5     | 0.02 $\pm$ 0.00     | 0.43 $\pm$ 0.01 | 0.87 $\pm$ 0.02 | 0.93 $\pm$ 0.02 |
|      |               | 12.5    | 0.02 $\pm$ 0.00     | 0.44 $\pm$ 0.01 | 0.82 $\pm$ 0.02 | 0.88 $\pm$ 0.01 |
| 30°C | BCDPS [mM]    | Control | 0.13 $\pm$ 0.01     | 0.69 $\pm$ 0.01 | 0.62 $\pm$ 0.04 | 0.53 $\pm$ 0.02 |
|      |               | 0.1     | 0.16 $\pm$ 0.01     | 0.71 $\pm$ 0.03 | 0.55 $\pm$ 0.03 | 0.56 $\pm$ 0.02 |
|      |               | 0.5     | 0.17 $\pm$ 0.02     | 0.81 $\pm$ 0.02 | 0.60 $\pm$ 0.03 | 0.56 $\pm$ 0.01 |
|      |               | 2.5     | 0.16 $\pm$ 0.01     | 0.85 $\pm$ 0.02 | 1.00 $\pm$ 0.02 | 0.84 $\pm$ 0.02 |
|      |               | 12.5    | 0.25 $\pm$ 0.03     | 0.67 $\pm$ 0.02 | 0.95 $\pm$ 0.03 | 0.78 $\pm$ 0.04 |

**Table S16.** Effect of the  $\beta$ -cyclodextrin polymer on the optical density of the planktonic supernatant of *P. aeruginosa*

| T    | Tested sample |      | Optical density of the planktonic supernatant [-] |             |             |             |
|------|---------------|------|---------------------------------------------------|-------------|-------------|-------------|
|      |               |      | 6 h                                               | 24 h        | 48 h        | 72 h        |
| 22°C | Control       |      | 0.02 ± 0.00                                       | 0.14 ± 0.01 | 0.47 ± 0.02 | 0.60 ± 0.05 |
|      | BCDPS [mM]    | 0.1  | 0.02 ± 0.00                                       | 0.16 ± 0.01 | 0.50 ± 0.00 | 0.60 ± 0.07 |
|      |               | 0.5  | 0.02 ± 0.00                                       | 0.15 ± 0.02 | 0.48 ± 0.01 | 0.65 ± 0.04 |
|      |               | 2.5  | 0.02 ± 0.00                                       | 0.17 ± 0.01 | 0.48 ± 0.01 | 0.62 ± 0.06 |
|      |               | 12.5 | 0.02 ± 0.00                                       | 0.20 ± 0.01 | 0.50 ± 0.02 | 0.60 ± 0.05 |
| 30°C | Control       |      | 0.09 ± 0.01                                       | 0.40 ± 0.04 | 0.36 ± 0.03 | 0.36 ± 0.03 |
|      | BCDPS [mM]    | 0.1  | 0.09 ± 0.01                                       | 0.41 ± 0.05 | 0.48 ± 0.02 | 0.35 ± 0.04 |
|      |               | 0.5  | 0.09 ± 0.01                                       | 0.53 ± 0.06 | 0.32 ± 0.02 | 0.35 ± 0.01 |
|      |               | 2.5  | 0.10 ± 0.00                                       | 0.49 ± 0.02 | 0.76 ± 0.05 | 0.67 ± 0.04 |
|      |               | 12.5 | 0.13 ± 0.01                                       | 0.44 ± 0.01 | 0.66 ± 0.03 | 0.72 ± 0.04 |
