# Supplementary material for: Effect of Cyclodextrins on the Biofilm Formation Capacity of Pseudomonas aeruginosa PAO1
Source: MDPI journal article supplement (doi:10.3390/molecules27113603), 2022-06-03
Supplement: s1 [file s1]

## S2. SUPPLEMENTARY MATERIALS

### Effect of Cyclodextrins on the Biofilm Formation Capacity of *Pseudomonas aeruginosa* PAO1

Zsófia Berkl<sup>1</sup>, Ildikó Fekete-Kertész<sup>1</sup>, Kata Buda<sup>1</sup>, Emese Vaszita<sup>1</sup>, Éva Fenyvesi<sup>2</sup>, Lajos Szenté<sup>2</sup> and Mónika Molnár<sup>1,\*</sup>

<sup>1</sup> Department of Applied Biotechnology and Food Science, Budapest University of Technology and Economics, Budapest, Hungary; berkl.zsofia@vbk.bme.hu (Z.B.); feketekertesz.ildiko@vbk.bme.hu (I.F.K.); kata.buda.bk@gmail.com (K.B.); vaszita.emese@vbk.bme.hu (E.V.); molnar.monika@vbk.bme.hu (M.M.)

<sup>2</sup> CycloLab Cyclodextrin R & D Laboratory Ltd., Budapest, Hungary; fenyvesi.e@cyclolab.hu (É.F.); szente@cyclolab.hu (L.S.)

\* Correspondence: molnar.monika@vbk.bme.hu

## RESULTS OF CORRELATION ANALYSES

Correlation coefficients between tested CD-concentrations and biofilm formation

## S2. SUPPLEMENTARY MATERIALS - RESULTS OF CORRELATION ANALYSES

**Table S1.** Correlation coefficients between tested CD-concentrations and biofilm formation (22 °C)

| Contact time | Correlation coefficients ( <i>r</i> )                |        |        |        |        |        |        |        |
|--------------|------------------------------------------------------|--------|--------|--------|--------|--------|--------|--------|
|              | Marked correlations are significant at $p < 0.05000$ |        |        |        |        |        |        |        |
|              | ACD                                                  | RAMEA  | QAACD  | ACDPS  | BCD    | RAMEB  | QABCD  | BCDPS  |
| 6 h          | -0.683                                               | -0.517 | -0.241 | -0.260 | -0.752 | 0.424  | 0.674  | -0.648 |
| 24 h         | -0.919                                               | -0.674 | 0.656  | -0.544 | -0.496 | -0.778 | -0.676 | -0.714 |
| 48 h         | -0.983                                               | -0.768 | -0.646 | -0.372 | -0.918 | -0.753 | 0.572  | -0.312 |
| 72 h         | -0.899                                               | -0.683 | -0.897 | -0.572 | -0.729 | -0.709 | 0.260  | -0.453 |

**Table S2.** Correlation coefficients between tested CD-concentrations and biofilm formation (30 °C)

| Contact time | Correlation coefficients ( <i>r</i> )                |        |        |        |        |        |        |        |
|--------------|------------------------------------------------------|--------|--------|--------|--------|--------|--------|--------|
|              | Marked correlations are significant at $p < 0.05000$ |        |        |        |        |        |        |        |
|              | ACD                                                  | RAMEA  | QAACD  | ACDPS  | BCD    | RAMEB  | QABCD  | BCDPS  |
| 6 h          | -0.842                                               | -0.881 | -0.546 | -0.571 | 0.069  | -0.909 | 0.664  | -0.830 |
| 24 h         | -0.742                                               | -0.756 | -0.605 | -0.423 | -0.670 | -0.399 | 0.021  | -0.506 |
| 48 h         | -0.660                                               | -0.688 | -0.575 | -0.560 | -0.638 | -0.571 | 0.273  | -0.076 |
| 72 h         | -0.659                                               | -0.762 | -0.858 | -0.251 | -0.772 | -0.716 | -0.571 | -0.627 |
